# Supplementary material
Source: publisher figshare collection journal article supplement (https://karger.figshare.com/ndownloader/files/8709817)
Supplement: Supplementary file 1 [file 8709817]

**Figure 1S.**

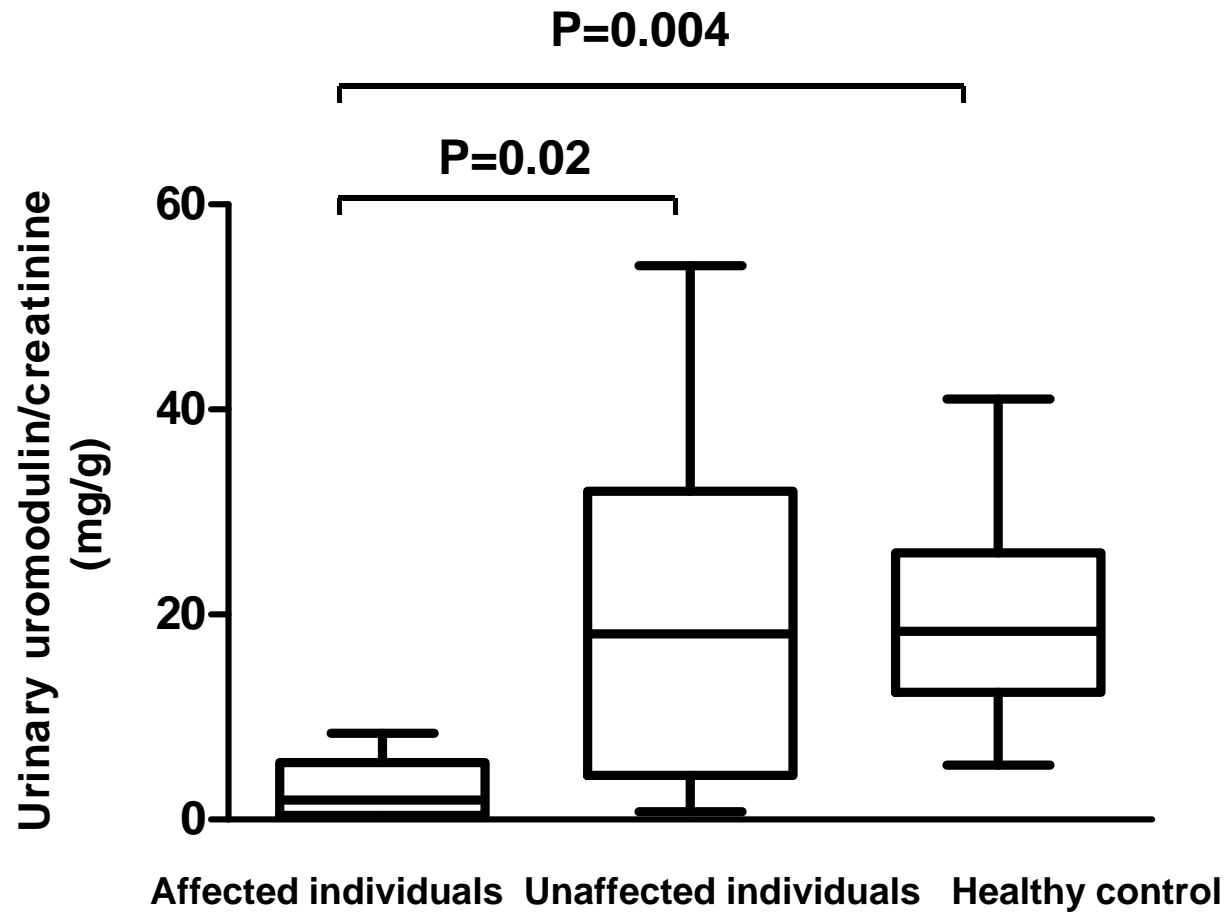

Figure 1S:  
Urinary uromodulin/creatinine ratios among affected individuals, unaffected individuals in the family and healthy controls. Plots show the range (whiskers), the median (horizontal line) and the 25% and 75% (box) percentiles. See results section for further details.
